# Supplementary material for: Comparing Predictive Utility of Head Computed Tomography Scan-Based Scoring Systems for Traumatic Brain Injury: A Retrospective Study
Source: MDPI journal article supplement (doi:10.3390/brainsci13081145), 2023-07-29
Supplement: s1 [file s1]

**Supplementary Table S1. Distribution of patients in Marshall, Rotterdam, NIRIS, and Helsinki categories according to outcome variables**

|           |            | In-hospital mortality<br>(n = 996) |               |         | ICU admission<br>(n = 994) <sup>1</sup> |               |         | Neurosurgery<br>(n = 996) |               |         | THLOS ≥ seven days<br>(n = 995) <sup>2</sup> |               |         |
|-----------|------------|------------------------------------|---------------|---------|-----------------------------------------|---------------|---------|---------------------------|---------------|---------|----------------------------------------------|---------------|---------|
|           |            | Yes<br>(n=27)                      | No<br>(n=969) | p       | Yes<br>(n=207)                          | No<br>(n=787) | p       | Yes<br>(n=82)             | No<br>(n=914) | p       | Yes<br>(n=205)                               | No<br>(n=790) | p       |
| Marshall  | I, n (%)   | 0 (0)                              | 646 (66.7)    | < 0.001 | 38 (18.4)                               | 607 (77.1)    | < 0.001 | 1 (1.2)                   | 645 (70.6)    | < 0.001 | 66 (32.2)                                    | 580 (73.4)    | < 0.001 |
|           | II, n (%)  | 7 (25.9)                           | 243 (25.1)    |         | 87 (42.0)                               | 162 (20.6)    |         | 16 (19.5)                 | 234 (25.6)    |         | 81 (39.5)                                    | 169 (21.4)    |         |
|           | III, n (%) | 6 (22.2)                           | 39 (4.0)      |         | 33 (15.9)                               | 12 (1.5)      |         | 22 (26.8)                 | 23 (2.5)      |         | 28 (13.7)                                    | 17 (2.2)      |         |
|           | IV, n (%)  | 3 (11.1)                           | 2 (0.2)       |         | 4 (1.9)                                 | 1 (0.1)       |         | 4 (4.9)                   | 1 (0.1)       |         | 1 (0.5)                                      | 3 (0.4)       |         |
|           | V, n (%)   | 0 (0)                              | 0 (0)         |         | 0 (0)                                   | 0 (0)         |         | 0 (0)                     | 0 (0)         |         | 0 (0)                                        | 0 (0)         |         |
|           | VI, n (%)  | 11 (40.7)                          | 39 (4.0)      |         | 45 (21.7)                               | 5 (0.6)       |         | 39 (47.6)                 | 11 (1.2)      |         | 29 (14.1)                                    | 21 (2.7)      |         |
| Rotterdam | 1, n (%)   | 0 (0)                              | 39 (4.0)      | < 0.001 | 14 (6.8)                                | 25 (3.2)      | < 0.001 | 4 (4.9)                   | 35 (3.8)      | < 0.001 | 9 (4.4)                                      | 30 (3.8)      | < 0.001 |
|           | 2, n (%)   | 3 (11.1)                           | 766 (79.1)    |         | 80 (38.6)                               | 687 (87.3)    |         | 17 (20.7)                 | 752 (82.3)    |         | 101 (49.3)                                   | 668 (84.6)    |         |
|           | 3, n (%)   | 7 (25.9)                           | 131 (13.5)    |         | 70 (33.8)                               | 68 (8.6)      |         | 26 (31.7)                 | 112 (12.3)    |         | 64 (31.2)                                    | 74 (9.4)      |         |
|           | 4, n (%)   | 6 (22.2)                           | 19 (2.0)      |         | 20 (9.7)                                | 5 (0.6)       |         | 17 (20.7)                 | 8 (0.9)       |         | 14 (6.8)                                     | 11 (1.4)      |         |
|           | 5, n (%)   | 7 (25.9)                           | 10 (1.0)      |         | 16 (7.7)                                | 1 (0.1)       |         | 13 (15.9)                 | 4 (0.4)       |         | 13 (6.3)                                     | 3 (0.4)       |         |
|           | 6, n (%)   | 4 (14.8)                           | 4 (0.4)       |         | 7 (3.4)                                 | 1 (0.1)       |         | 5 (6.1)                   | 3 (0.3)       |         | 4 (2.0)                                      | 4 (0.5)       |         |
| NIRIS     | 0, n (%)   | 0 (0)                              | 577 (59.5)    | < 0.001 | 35 (16.9)                               | 541 (68.7)    | < 0.001 | 1 (1.2)                   | 576 (63.0)    | < 0.001 | 62 (30.2)                                    | 515 (65.2)    | < 0.001 |
|           | 1, n (%)   | 0 (0)                              | 167 (17.2)    |         | 24 (11.6)                               | 143 (18.2)    |         | 0 (0)                     | 167 (18.3)    |         | 28 (13.7)                                    | 139 (17.6)    |         |
|           | 2, n (%)   | 9 (33.3)                           | 174 (18.0)    |         | 86 (41.5)                               | 96 (12.2)     |         | 27 (32.9)                 | 156 (17.1)    |         | 74 (36.1)                                    | 109 (13.8)    |         |
|           | 3, n (%)   | 8 (29.6)                           | 26 (2.7)      |         | 33 (15.9)                               | 1 (0.1)       |         | 27 (32.9)                 | 7 (0.8)       |         | 21 (10.2)                                    | 13 (1.6)      |         |
|           | 4, n (%)   | 10 (37.0)                          | 25 (2.6)      |         | 29 (14.0)                               | 6 (0.8)       |         | 27 (32.9)                 | 8 (0.9)       |         | 20 (9.8)                                     | 14 (1.8)      |         |
| Helsinki  | -3, n (%)  | 0 (0)                              | 43 (4.4)      | < 0.001 | 12 (5.8)                                | 30 (3.8)      | < 0.001 | 3 (3.7)                   | 40 (4.4)      | < 0.001 | 8 (3.9)                                      | 35 (4.4)      | < 0.001 |
|           | -2, n (%)  | 0 (0)                              | 9 (0.9)       |         | 5 (2.4)                                 | 4 (0.5)       |         | 4 (4.9)                   | 5 (0.5)       |         | 4 (2.0)                                      | 5 (0.6)       |         |
|           | -1, n (%)  | 1 (3.7)                            | 19 (2.0)      |         | 12 (5.8)                                | 8 (1.0)       |         | 5 (6.1)                   | 15 (1.6)      |         | 7 (3.4)                                      | 13 (1.6)      |         |
|           | 0, n (%)   | 1 (3.7)                            | 742 (76.6)    |         | 71 (34.3)                               | 671 (85.3)    |         | 10 (12.2)                 | 733 (80.2)    |         | 97 (47.3)                                    | 646 (81.8)    |         |
|           | 1, n (%)   | 0 (0)                              | 6 (0.6)       |         | 3 (1.4)                                 | 3 (0.4)       |         | 2 (2.4)                   | 4 (0.4)       |         | 4 (2.0)                                      | 2 (0.3)       |         |
|           | 2, n (%)   | 3 (11.1)                           | 86 (8.9)      |         | 30 (14.5)                               | 59 (7.5)      |         | 8 (9.8)                   | 81 (8.9)      |         | 27 (13.2)                                    | 62 (7.8)      |         |
|           | 3, n (%)   | 6 (22.2)                           | 24 (2.5)      |         | 23 (11.1)                               | 7 (0.9)       |         | 11 (13.4)                 | 19 (2.1)      |         | 19 (9.3)                                     | 10 (1.3)      |         |
|           | 4, n (%)   | 2 (7.4)                            | 12 (1.2)      |         | 12 (5.8)                                | 2 (0.3)       |         | 10 (12.2)                 | 4 (0.4)       |         | 10 (4.9)                                     | 4 (0.5)       |         |
|           | 5, n (%)   | 0 (0)                              | 11 (1.1)      |         | 9 (4.3)                                 | 2 (0.3)       |         | 7 (8.5)                   | 4 (0.4)       |         | 8 (3.9)                                      | 3 (0.4)       |         |
|           | 6, n (%)   | 2 (7.4)                            | 2 (0.2)       |         | 4 (1.9)                                 | 0 (0)         |         | 4 (4.9)                   | 0 (0)         |         | 2 (1.0)                                      | 2 (0.3)       |         |
|           | 7, n (%)   | 5 (18.5)                           | 6 (0.6)       |         | 11 (5.3)                                | 0 (0)         |         | 9 (11.0)                  | 2 (0.2)       |         | 8 (3.9)                                      | 3 (0.4)       |         |
|           | 8, n (%)   | 1 (3.7)                            | 2 (0.2)       |         | 3 (1.4)                                 | 0 (0)         |         | 2 (2.4)                   | 1 (0.1)       |         | 1 (0.5)                                      | 2 (0.3)       |         |
|           | 9, n (%)   | 2 (7.4)                            | 5 (0.5)       |         | 7 (3.4)                                 | 0 (0)         |         | 4 (4.9)                   | 3 (0.3)       |         | 6 (2.9)                                      | 1 (0.1)       |         |
|           | 10, n (%)  | 1 (3.7)                            | 0 (0)         |         | 1 (0.5)                                 | 0 (0)         |         | 0 (0)                     | 1 (0.1)       |         | 1 (0.5)                                      | 0 (0)         |         |
|           | 11, n (%)  | 1 (3.7)                            | 2 (0.2)       |         | 2 (1.0)                                 | 1 (0.1)       |         | 3 (3.7)                   | 0 (0)         |         | 2 (1.0)                                      | 1 (0.1)       |         |
|           | 12, n (%)  | 2 (7.4)                            | 0 (0)         |         | 2 (1.0)                                 | 0 (0)         |         | 2 (0.2)                   | 0 (0)         |         | 1 (0.5)                                      | 1 (0.1)       |         |
|           | 13, n (%)  | 0 (0)                              | 0 (0)         |         | 0 (0)                                   | 0 (0)         |         | 0 (0)                     | 0 (0)         |         | 0 (0)                                        | 0 (0)         |         |
|           | 14, n (%)  | 0 (0)                              | 0 (0)         |         | 0 (0)                                   | 0 (0)         |         | 0 (0)                     | 0 (0)         |         | 0 (0)                                        | 0 (0)         |         |

1. Two patients had unknown ICU admission status.

2. One patient had unknown THLOS.

CT: computed tomography; ICU: intensive care unit; IQR: interquartile range; NIRIS: NeuroImaging Radiological Interpretation System; THLOS: total hospital length of stay
